# Supplementary material
Source: PubMed Central journal article supplement (PMC6472901)
Supplement: NIHMS1020622-supplement-Data.pdf [file NIHMS1020622-supplement-Data.pdf]

Supplemental online content for:

## **Impact of Incident Cancer on Short-Term Coronary Artery Disease–Related Healthcare Expenditures Among Medicare Beneficiaries**

Ishveen Chopra, PhD, MBA; Malcolm D. Mattes, MD; Patricia Findley, DrPH, MSW, LCSW; Xi Tan, PharmD, PhD; Nilanjana Dwivedi, MBA, PhD; and Usha Sambamoorthi, PhD

*J Natl Compr Canc Netw* 2019;17(2):149–158

**eAppendix 1:** Adjusted Relationship Between Characteristics and CAD-Related Expenditures

**eAppendix 2:** Multinomial Logistic Regression Models Used to Derive Inverse Probability Treatment Weights

| Appendix 1. Adjusted Relationship Between Characteristics and CAD-Related Expenditures |         |      |         |
|----------------------------------------------------------------------------------------|---------|------|---------|
| Characteristics                                                                        | $\beta$ | SE   | P Value |
| <b>Predisposing factors</b>                                                            |         |      |         |
| Age, y                                                                                 |         |      |         |
| 68–70                                                                                  | −0.50   | 0.04 | .000    |
| 71–74                                                                                  | −0.48   | 0.04 | .000    |
| 75–79                                                                                  | −0.35   | 0.03 | .000    |
| ≥80                                                                                    | Ref     |      |         |
| Race/Ethnicity                                                                         |         |      |         |
| White                                                                                  | 0.33    | 0.05 | .000    |
| African American                                                                       | 0.79    | 0.07 | .000    |
| Hispanic                                                                               | 0.31    | 0.08 | .000    |
| Other                                                                                  | Ref     |      |         |
| <b>Enabling factors</b>                                                                |         |      |         |
| Education level                                                                        |         |      |         |
| < national avg 12%                                                                     | 0.06    | 0.03 | .031    |
| ≥ national avg 12%                                                                     | Ref     |      |         |
| Poverty level                                                                          |         |      |         |
| < national avg 14.3%                                                                   | −0.03   | 0.03 | .262    |
| ≥ national avg 14.3%                                                                   | Ref     |      |         |
| Donut hole                                                                             |         |      |         |
| Not reached                                                                            | −0.35   | 0.05 | .000    |
| Reached                                                                                | 0.06    | 0.06 | .337    |
| Exceeded                                                                               | Ref     |      |         |
| <b>Need factors<sup>a</sup></b>                                                        |         |      |         |
| Concordant PHCs                                                                        |         |      |         |
| Yes                                                                                    | 0.64    | 0.08 | .000    |
| No                                                                                     | Ref     |      |         |
| Discordant PHCs                                                                        |         |      |         |
| Yes                                                                                    | 0.39    | 0.03 | .000    |
| No                                                                                     | Ref     |      |         |
| Mental health conditions                                                               |         |      |         |
| Yes                                                                                    | 0.74    | 0.03 | .000    |
| No                                                                                     | Ref     |      |         |
| CAD severity                                                                           | 0.80    | 0.06 | .000    |
| <b>Health behavior</b>                                                                 |         |      |         |
| Tobacco use                                                                            |         |      |         |
| Yes                                                                                    | 0.36    | 0.05 | .000    |
| No                                                                                     | Ref     |      |         |
| Alcohol use                                                                            |         |      |         |
| Yes                                                                                    | 0.43    | 0.11 | .000    |
| No                                                                                     | Ref     |      |         |

| Appendix 1. Adjusted Relationship Between Characteristics and CAD-Related Expenditures (cont.) |         |      |         |
|------------------------------------------------------------------------------------------------|---------|------|---------|
| Characteristics                                                                                | $\beta$ | SE   | P Value |
| <b>Healthcare use</b>                                                                          |         |      |         |
| Primary care visit                                                                             |         |      |         |
| Yes                                                                                            | 1.23    | 0.03 | .000    |
| No                                                                                             | Ref     |      |         |
| Cardiologist visit                                                                             |         |      |         |
| Yes                                                                                            | 1.96    | 0.02 | .000    |
| No                                                                                             | Ref     |      |         |
| Adherence to medication <sup>b</sup>                                                           |         |      |         |
| No ADH 2 Rx                                                                                    | 0.55    | 0.04 | .000    |
| ADH 1 of 2 Rx                                                                                  | 0.22    | 0.03 | .000    |
| ADH 1 Rx                                                                                       | −0.18   | 0.04 | .000    |
| No ADH 1 Rx                                                                                    | 0.25    | 0.04 | .000    |
| ADH 2 Rx                                                                                       | Ref     |      |         |
| <b>External environment and county-level factors</b>                                           |         |      |         |
| SEER region                                                                                    |         |      |         |
| Northeast                                                                                      | −0.25   | 0.05 | .000    |
| South                                                                                          | −0.02   | 0.05 | .710    |
| North Central                                                                                  | −0.12   | 0.05 | .010    |
| West                                                                                           | Ref     |      |         |
| Metropolitan status                                                                            |         |      |         |
| Metropolitan                                                                                   | −0.25   | 0.04 | .000    |
| Nonmetropolitan                                                                                | Ref     |      |         |
| Health Professional Shortage Area                                                              |         |      |         |
| No shortage                                                                                    | −0.05   | 0.05 | .276    |
| Part county                                                                                    | 0.13    | 0.03 | .000    |
| Whole county                                                                                   | Ref     |      |         |
| Federally Qualified Health Center                                                              |         |      |         |
| None                                                                                           | 0.04    | 0.06 | .510    |
| 1 to 10                                                                                        | 0.06    | 0.04 | .119    |
| ≥ 11                                                                                           | Ref     |      |         |
| Rural health centers                                                                           |         |      |         |
| Yes                                                                                            | 0.02    | 0.03 | .534    |
| No                                                                                             | Ref     |      |         |
| Time                                                                                           | 0.02    | 0.01 | .000    |

Abbreviations: ACEI, angiotensin converting enzyme inhibitor; ADH, ARB, angiotensin II receptor blocker; avg, average; CAD, coronary artery disease; PHC, physical health condition.

<sup>a</sup>Concordant PHCs consisted of diabetes, hyperlipidemia, hypertension, stroke, cardiac arrhythmia, and congestive heart failure. Discordant PHCs consisted of arthritis, asthma, chronic obstructive pulmonary disease, osteoporosis, dementia, HIV, and hepatitis. Mental health conditions included anxiety, depression, serious mental illness (schizophrenia, bipolar disorder, psychoses). Significance was derived from adjusted generalized linear model with gamma distribution and log-link. The analysis used 6 repeated measures.

<sup>b</sup>No ADH 2 Rx, not adherent to both medication classes; ADH 1 of 2 Rx, adherent to either statins or ACEIs/ARBs/β-blockers; ADH 1 Rx, use of 1 medication class and adherent to that class; No ADH 1 Rx, use of 1 medication class and not adherent to that medication class; ADH 2 Rx, adherent to both statins and ACEIs/ARBs/β-blockers.

| eAppendix 2. Multinomial Logistic Regression Models Used to Derive Inverse Probability Treatment Weights |               |           |                  |             |           |                  |           |           |                  |                 |           |                  |                   |           |                  |
|----------------------------------------------------------------------------------------------------------|---------------|-----------|------------------|-------------|-----------|------------------|-----------|-----------|------------------|-----------------|-----------|------------------|-------------------|-----------|------------------|
| Characteristics                                                                                          | Breast Cancer |           |                  | CRC (Women) |           |                  | CRC (Men) |           |                  | Prostate Cancer |           |                  | No Cancer (Women) |           |                  |
|                                                                                                          | OR            | 95% CI    | Sig <sup>a</sup> | OR          | 95% CI    | Sig <sup>a</sup> | OR        | 95% CI    | Sig <sup>a</sup> | OR              | 95% CI    | Sig <sup>a</sup> | OR                | 95% CI    | Sig <sup>a</sup> |
| Age, y                                                                                                   |               |           |                  |             |           |                  |           |           |                  |                 |           |                  |                   |           |                  |
| 68-70                                                                                                    | 0.48          | 0.43-0.54 | ***              | 0.24        | 0.20-0.28 | ***              | 0.56      | 0.47-0.67 | ***              | 1.45            | 1.31-1.60 | ***              | 0.39              | 0.37-0.42 | ***              |
| 71-74                                                                                                    | 0.66          | 0.60-0.73 | ***              | 0.36        | 0.31-0.42 | ***              | 0.84      | 0.73-0.98 | *                | 1.94            | 1.77-2.13 | ***              | 0.47              | 0.45-0.51 | ***              |
| 75-79                                                                                                    | 0.87          | 0.80-0.96 | **               | 0.55        | 0.49-0.63 | ***              | 0.91      | 0.78-1.05 | ***              | 1.81            | 1.64-1.99 | ***              | 0.59              | 0.56-0.63 | ***              |
| ≥80                                                                                                      | Ref           |           |                  |             |           |                  |           |           |                  |                 |           |                  |                   |           |                  |
| Race/Ethnicity                                                                                           |               |           |                  |             |           |                  |           |           |                  |                 |           |                  |                   |           |                  |
| African American                                                                                         | 1.51          | 1.32-1.72 | ***              | 1.93        | 1.62-2.29 | ***              | 0.80      | 0.62-1.04 | ***              | 1.21            | 1.06-1.38 | **               | 1.87              | 1.71-2.05 | ***              |
| Hispanic                                                                                                 | 0.7           | 0.57-0.86 | ***              | 0.59        | 0.42-0.83 | **               | 0.51      | 0.35-0.74 | ***              | 0.65            | 0.54-0.80 | ***              | 1.13              | 1.01-1.27 | *                |
| Other                                                                                                    | 0.41          | 0.35-0.48 | ***              | 0.72        | 0.59-0.88 | **               | 0.78      | 0.64-0.95 | *                | 0.52            | 0.46-0.59 | ***              | 0.93              | 0.86-1.00 |                  |
| White                                                                                                    | Ref           |           |                  |             |           |                  |           |           |                  |                 |           |                  |                   |           |                  |
| Concordant PHC                                                                                           |               |           |                  |             |           |                  |           |           |                  |                 |           |                  |                   |           |                  |
| Yes                                                                                                      | 1.46          | 1.24-1.73 | ***              | 1.69        | 1.29-2.20 | ***              | 1.61      | 1.25-2.09 | ***              | 1.54            | 1.34-1.78 | ***              | 1.00              | 0.92-1.09 |                  |
| No                                                                                                       | Ref           |           |                  |             |           |                  |           |           |                  |                 |           |                  |                   |           |                  |
| Discordant PHC                                                                                           |               |           |                  |             |           |                  |           |           |                  |                 |           |                  |                   |           |                  |
| Yes                                                                                                      | 1.68          | 1.56-1.81 | ***              | 1.82        | 1.64-2.02 | ***              | 1.13      | 1.01-1.27 | *                | 0.96            | 0.89-1.03 | ***              | 1.75              | 1.67-1.84 | ***              |
| No                                                                                                       | Ref           |           |                  |             |           |                  |           |           |                  |                 |           |                  |                   |           |                  |
| Mental health conditions                                                                                 |               |           |                  |             |           |                  |           |           |                  |                 |           |                  |                   |           |                  |
| Yes                                                                                                      | 1.20          | 1.07-1.34 | **               | 1.19        | 1.02-1.39 | *                | 0.89      | 0.73-1.09 |                  | 0.58            | 0.50-0.66 | ***              | 1.48              | 1.37-1.59 | ***              |
| No                                                                                                       | Ref           |           |                  |             |           |                  |           |           |                  |                 |           |                  |                   |           |                  |
| SEER region                                                                                              |               |           |                  |             |           |                  |           |           |                  |                 |           |                  |                   |           |                  |
| Northeast                                                                                                | 1.31          | 1.19-1.45 | ***              | 1.58        | 1.38-1.81 | ***              | 1.32      | 1.14-1.54 | ***              | 1.09            | 0.99-1.20 | ***              | 1.27              | 1.20-1.36 | ***              |
| South                                                                                                    | 1.12          | 1.02-1.24 | *                | 1.34        | 1.16-1.54 | ***              | 1.02      | 0.87-1.18 | ***              | 0.99            | 0.91-1.08 | ***              | 1.24              | 1.16-1.31 | ***              |
| North Central                                                                                            | 1.41          | 1.25-1.58 | ***              | 1.68        | 1.42-1.98 | ***              | 1.30      | 1.08-1.56 | **               | 1.35            | 1.22-1.51 | ***              | 1.26              | 1.17-1.36 | ***              |
| West                                                                                                     | Ref           |           |                  |             |           |                  |           |           |                  |                 |           |                  |                   |           |                  |
| Index year                                                                                               |               |           |                  |             |           |                  |           |           |                  |                 |           |                  |                   |           |                  |
| 2008                                                                                                     | 0.93          | 0.84-1.04 |                  | 0.91        | 0.78-1.05 |                  | 1.02      | 0.87-1.20 |                  | 1.12            | 1.02-1.23 | *                | 0.89              | 0.83-0.95 | ***              |
| 2009                                                                                                     | 0.95          | 0.86-1.05 |                  | 0.89        | 0.77-1.03 |                  | 0.94      | 0.80-1.10 |                  | 1.06            | 0.96-1.16 |                  | 0.90              | 0.84-0.96 | ***              |
| 2010                                                                                                     | 0.97          | 0.87-1.07 |                  | 0.94        | 0.82-1.09 |                  | 0.98      | 0.84-1.14 |                  | 0.97            | 0.89-1.07 |                  | 0.98              | 0.92-1.05 |                  |
| 2011                                                                                                     | Ref           |           |                  |             |           |                  |           |           |                  |                 |           |                  |                   |           |                  |

Abbreviations: CAD, coronary artery disease; CRC, colorectal cancer; PHC, physical health conditions; sig, significance.  
<sup>a</sup>Asterisks represent significant differences in patient-level characteristics. No cancer (men) is the reference category for dependent variable.  
 \*\*\*P<.001; \*\*P<.01; \*P<.05.
